# Supplementary material for: Ophiopogon Polysaccharide Promotes the In Vitro Metabolism of Ophiopogonins by Human Gut Microbiota
Source: PubMed Central journal article supplement (PMC6719028; doi:10.3390/molecules24162886), 2019-08-08
Supplement: molecules-24-02886-s001.pdf [file molecules-24-02886-s001.pdf]

1

## Supplementary Materials

2

3

4

5

6

7

8

**Figure S1.** *Ophiopogon* polysaccharide promotes the metabolism of ophiopogonin D and ophiopogonin D', and the production of ruscogenin and diosgenin. The  $AUC_{0-72h}$  of ophiopogonin D, ruscogenin, ophiopogonin D' and diosgenin in different groups. Normal: ophiopogonin group; OJP: *Ophiopogon* polysaccharide (OJP) + ophiopogonin group. The area under the concentration–time curve ( $AUC_{0-72h}$ ) were analyzed by Graphpad Prism software (v7.0). Data are represented as mean  $\pm$  SD ( $n = 5$ ). Significance difference was assessed by one-way ANOVA: \* $P < 0.05$  and \*\* $P < 0.01$  vs normal group.

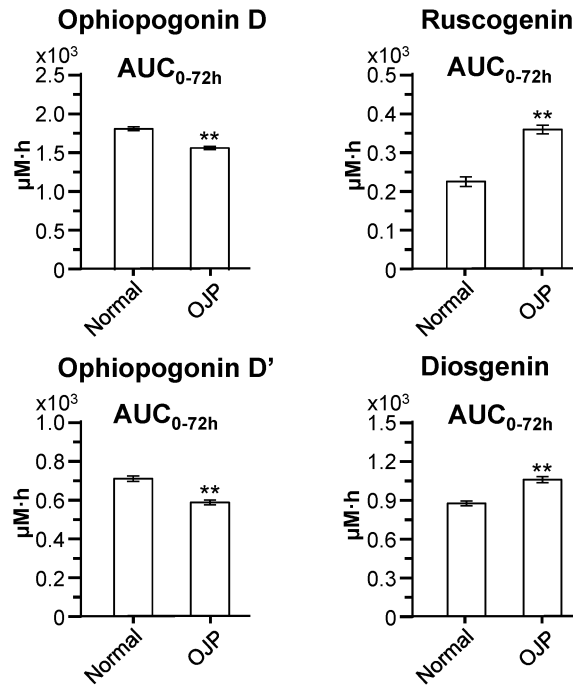

9

10

**Table S1.** Concentrations of ophiopogonin D, ophiopogonin D' and their metabolites (i.e. ruscogenin and Diosgenin ) in ten time points of normal group and OJP group.

| Analyte         | Group               | Concentrations of ophiopogonins ( $\mu\text{M}$ ): mean $\pm$ SD ( $n = 5$ ) <sup>c</sup> |                  |                  |                  |                  |                  |                  |                  |                  |                  |
|-----------------|---------------------|-------------------------------------------------------------------------------------------|------------------|------------------|------------------|------------------|------------------|------------------|------------------|------------------|------------------|
|                 |                     | 0 h                                                                                       | 6 h              | 12 h             | 18 h             | 24 h             | 30 h             | 36 h             | 48 h             | 60 h             | 72 h             |
| Ophiopogonin D  | OJP <sup>a</sup>    | 30.53 $\pm$ 0.54                                                                          | 30.08 $\pm$ 0.84 | 29.04 $\pm$ 0.65 | 27.36 $\pm$ 1.14 | 23.31 $\pm$ 0.79 | 22.72 $\pm$ 1.10 | 21.72 $\pm$ 0.88 | 20.01 $\pm$ 1.31 | 17.49 $\pm$ 1.19 | 10.86 $\pm$ 1.17 |
|                 | Normal <sup>b</sup> | 30.61 $\pm$ 0.65                                                                          | 30.07 $\pm$ 1.08 | 29.67 $\pm$ 0.89 | 28.09 $\pm$ 1.33 | 27.43 $\pm$ 1.35 | 25.78 $\pm$ 1.03 | 25.13 $\pm$ 1.38 | 24.19 $\pm$ 1.56 | 23.36 $\pm$ 1.58 | 18.36 $\pm$ 1.36 |
| Ruscogenin      | OJP                 | ND <sup>d</sup>                                                                           | ND               | ND               | 0.60 $\pm$ 0.03  | 2.00 $\pm$ 0.20  | 4.12 $\pm$ 0.50  | 4.93 $\pm$ 0.46  | 6.87 $\pm$ 0.52  | 8.94 $\pm$ 0.90  | 14.53 $\pm$ 0.92 |
|                 | Normal              | ND                                                                                        | ND               | ND               | ND               | 0.90 $\pm$ 0.09  | 2.25 $\pm$ 0.34  | 3.53 $\pm$ 0.54  | 4.81 $\pm$ 0.83  | 5.62 $\pm$ 0.77  | 8.48 $\pm$ 1.15  |
| Ophiopogonin D' | OJP                 | 30.01 $\pm$ 0.77                                                                          | 26.95 $\pm$ 1.54 | 20.24 $\pm$ 1.34 | 17.45 $\pm$ 1.69 | 11.97 $\pm$ 1.19 | 1.63 $\pm$ 0.17  | 0.84 $\pm$ 0.01  | 0.80 $\pm$ 0.08  | 0.72 $\pm$ 0.06  | 0.63 $\pm$ 0.02  |
|                 | Normal              | 29.53 $\pm$ 0.95                                                                          | 27.48 $\pm$ 1.37 | 25.93 $\pm$ 1.54 | 24.01 $\pm$ 1.90 | 17.39 $\pm$ 1.59 | 2.30 $\pm$ 0.26  | 1.55 $\pm$ 0.27  | 1.02 $\pm$ 0.07  | 0.85 $\pm$ 0.10  | 0.78 $\pm$ 0.04  |
| Diosgenin       | OJP                 | ND                                                                                        | ND               | 0.41 $\pm$ 0.03  | 1.51 $\pm$ 0.15  | 9.91 $\pm$ 0.86  | 18.42 $\pm$ 1.02 | 20.28 $\pm$ 1.18 | 21.51 $\pm$ 1.11 | 22.76 $\pm$ 1.68 | 28.72 $\pm$ 2.10 |
|                 | Normal              | ND                                                                                        | ND               | ND               | 0.17 $\pm$ 0.04  | 8.45 $\pm$ 0.11  | 16.51 $\pm$ 0.67 | 17.60 $\pm$ 0.93 | 18.64 $\pm$ 1.25 | 18.90 $\pm$ 1.05 | 20.76 $\pm$ 1.63 |

11

<sup>a</sup> OJP: *Ophiopogon* polysaccharide (OJP) + ophiopogonin group; <sup>b</sup> Normal: ophiopogonin group; <sup>c</sup> Data are represented as mean  $\pm$  SD ( $n = 5$ ); <sup>d</sup> ND: not detected.
